# Supplementary material for: Superficial temporal artery flap for reconstruction of complex facial defects: A new algorithm
Source: PubMed Central journal article supplement — Arch Plast Surg. 2018 Mar 5;45(2):118–27. doi: 10.5999/aps.2017.00360 (PMC5869424; doi:10.5999/aps.2017.00360), 2018-03-05

**Supplemental Fig. S1. Orbital reconstruction**

(A) Preoperative: a 25-year-old male patient with extensive periorbital skin loss and a ruptured globe. (B) Postoperative: after bone restoration and soft tissue reconstruction. (C) After debridement and excision of the globe remnant with fixation with microplates all around the orbital rim. (D) Island temporoparietal flap skin island with a temporal fascia extension; the skin island was for the lower eyelid and malar and infraorbital cheek region, while the temporal fascia extension was for eye socket resurfacing with coverage by a split-thickness skin graft. (E) After tunneling of the flap. (F) Post operative results.

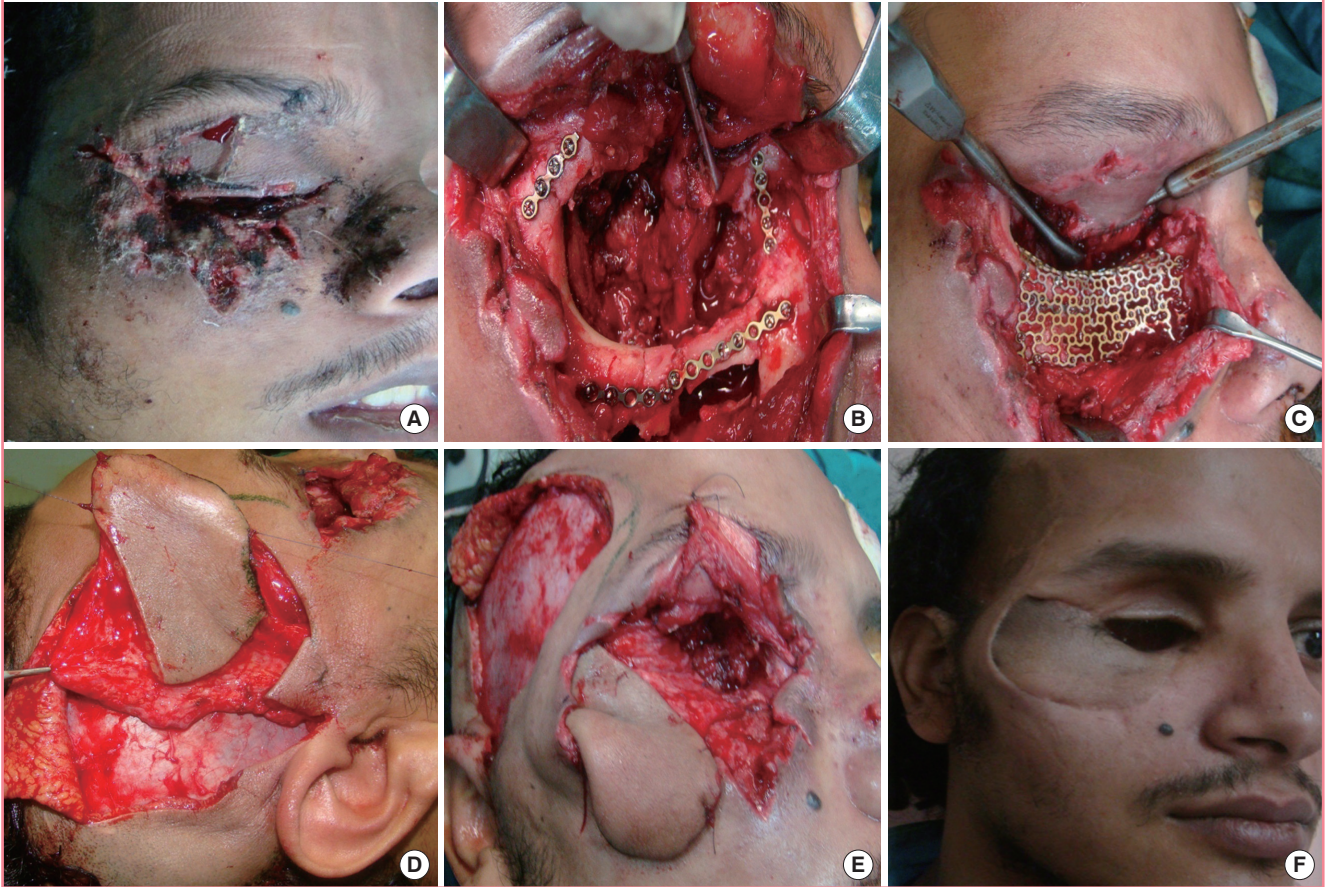

Supplement: aps-2017-00360-suppl1.pdf [file aps-2017-00360-suppl1.pdf]
