# Supplementary material for: Superficial temporal artery flap for reconstruction of complex facial defects: A new algorithm
Source: PubMed Central journal article supplement — Arch Plast Surg. 2018 Mar 5;45(2):118–27. doi: 10.5999/aps.2017.00360 (PMC5869424; doi:10.5999/aps.2017.00360), 2018-03-05

Supplemental Fig. S2. Palate reconstruction

(A) Harvesting of a temporoparietal osteofacial flap (full-thickness vascularized bone). (B) Insetting of the flap (fascia above the bone as the nasal layer with rigid fixation of bone graft with bony palate). (C) Reinforcement of the fascial extension as the oral layer down the bone graft and coverage of the flap with a split-thickness skin graft. (D) Immediate post operative result.

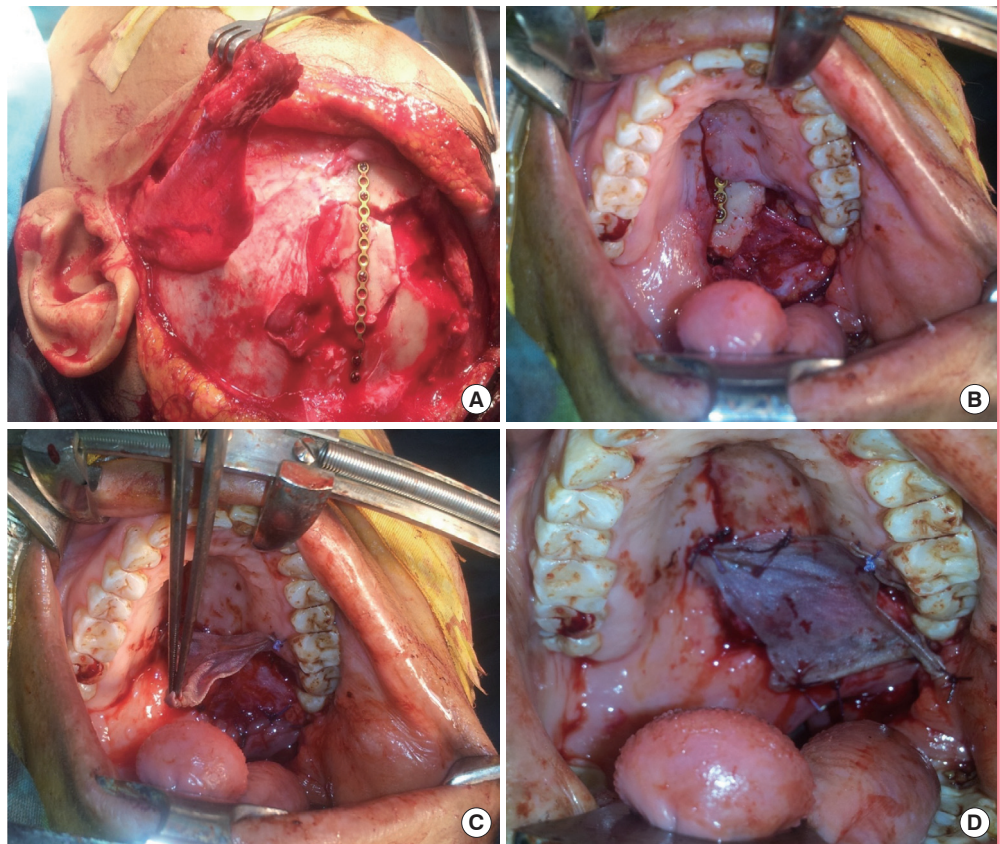

Supplement: aps-2017-00360-suppl2.pdf [file aps-2017-00360-suppl2.pdf]
