# Supplementary material for: Superficial temporal artery flap for reconstruction of complex facial defects: A new algorithm
Source: PubMed Central journal article supplement — Arch Plast Surg. 2018 Mar 5;45(2):118–27. doi: 10.5999/aps.2017.00360 (PMC5869424; doi:10.5999/aps.2017.00360), 2018-03-05

**Supplemental Fig. S3. Lower eyelid reconstruction**

(A) A 22-year-old male patient presented after a gunshot injury. (B) lateral view post operative. (C) Reconstruction of the orbital floor. (D) An island temporoparietal flap was elevated through the coronal approach. (E) Insetting of the flap. (F) Early postoperative picture, before hair ablation.

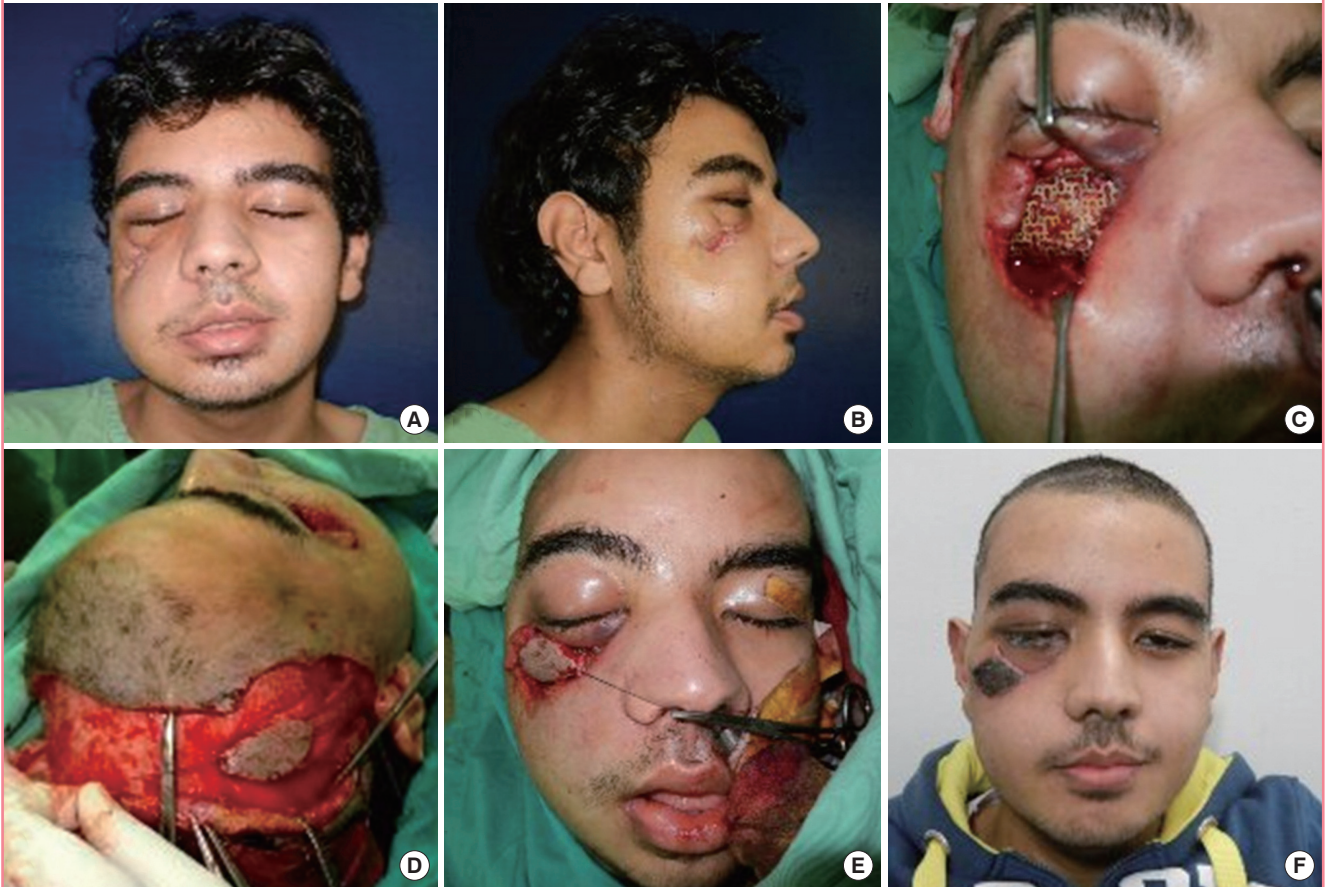

Supplement: aps-2017-00360-suppl3.pdf [file aps-2017-00360-suppl3.pdf]
