# Supplementary material for: Superficial temporal artery flap for reconstruction of complex facial defects: A new algorithm
Source: PubMed Central journal article supplement — Arch Plast Surg. 2018 Mar 5;45(2):118–27. doi: 10.5999/aps.2017.00360 (PMC5869424; doi:10.5999/aps.2017.00360), 2018-03-05

**Supplemental Fig. S4. Eyebrow reconstruction**

(A) A 7-year-old male patient with craniofacial cleft and congenital alopecia of the right eyebrow, and the design of the flap and proposed eyebrow. (B) After harvesting of the flap, note that a good tunnel was mandatory to avoid congestion (the white arrows refer to the superficial temporal artery and its two branches). (C) Immediate postoperative photograph with direct closure of the donor site.

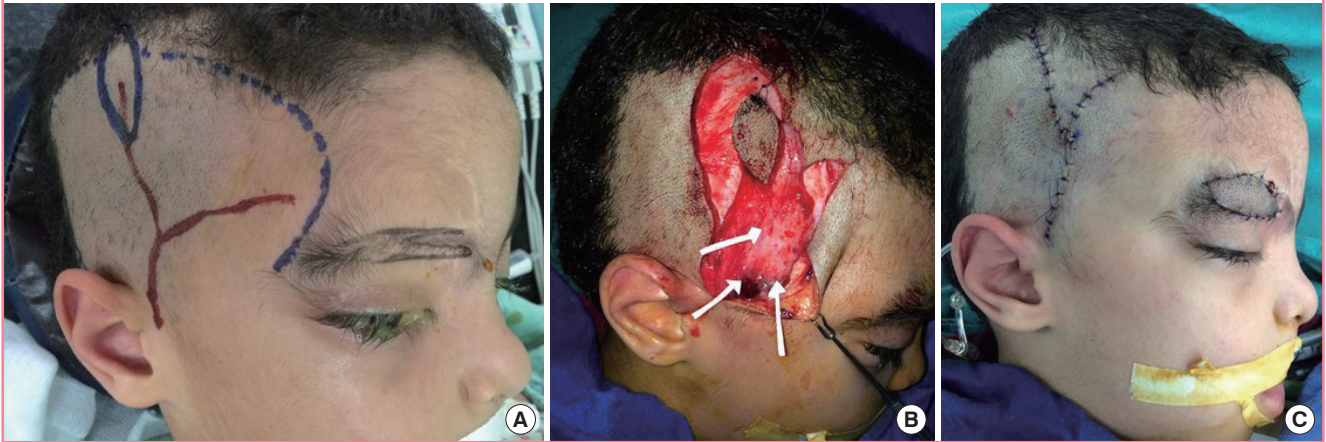

Supplement: aps-2017-00360-suppl4.pdf [file aps-2017-00360-suppl4.pdf]
